# Supplementary material for: Safety and Efficacy of Hybrid Cooperative Complexes of Sodium Hyaluronate and Sodium Chondroitin for the Treatment of Patients with Symptomatic Knee Osteoarthritis
Source: PubMed Central journal article supplement — Rheumatol Ther. 2024 Feb 12;11(2):381–95. doi: 10.1007/s40744-024-00643-8 (PMC10920506; doi:10.1007/s40744-024-00643-8), 2024-02-12
Supplement: 40744_2024_643_MOESM1_ESM.pdf [file 40744_2024_643_MOESM1_ESM.pdf]

## **SUPPLEMENTARY MATERIALS**

### **Safety and Efficacy of Hybrid Cooperative Complexes of Sodium Hyaluronate and Sodium Chondroitin for the Treatment of Patients with Symptomatic Knee Osteoarthritis**

#### **Authors**

Cristiano Sconza MD,<sup>1,2\*</sup> Dario Romano MD,<sup>1</sup> Dalila Scaturro MD,<sup>3</sup> Giulia Letizia Mauro Prof.,<sup>3</sup> Stefano Respizzi MD,<sup>1</sup> Elizaveta Kon Prof.,<sup>2,4</sup> Berardo di Matteo MD,<sup>2,4</sup>

#### **Affiliations**

<sup>1</sup>Department of Rehabilitation, IRCCS Humanitas Research Hospital, via Manzoni 56, 20089, Milan, Rozzano, Italy

<sup>2</sup>Department of Biomedical Sciences, Humanitas University, Via Rita Levi Montalcini 4, 20072, Milan, Pieve Emanuele, Italy

<sup>3</sup>Department of Surgical, Oncological and Stomatological Disciplines, University of Palermo, Via del Vespro, 129, 90127 Palermo, Italy

<sup>4</sup>Department of Traumatology, Orthopaedics and Disaster Surgery, Sechenov First Moscow State Medical University, 119991, Moscow, Russia

**\*Corresponding Author**

Dr Cristiano Sconza,

Department of Rehabilitation, IRCCS Humanitas Research Hospital, via Manzoni 56,  
20089, Milan, Rozzano, Italy

Telephone number: +39 3332781989

Fax number: +39 3332781989

Email: [cristiano.sconza@humanitas.it](mailto:cristiano.sconza@humanitas.it)

## **Supplementary Material**

Table S1. Patient reported outcomes (median [IQR] WOMAC scores) for patients who needed two injections at the 30-day follow-up visit.

Table S2. Patient reported outcomes (median [IQR] VAS and PtGA scores) for patients who needed two injections at the 30-day follow-up visit.

Table S3. Safety findings and number of patients who needed rescue medication for patients who needed two injections at the 30-day follow-up visit.

**Table S1. Patient reported outcomes (median [IQR] WOMAC scores) for patients who needed two injections at the 30-day follow-up visit**

|                              | Median (IQR) |                              |                            |                                         |                            |                              | Change<br>from<br>baseline<br>to Day<br>180 | Friedman<br>test<br>p-value   |
|------------------------------|--------------|------------------------------|----------------------------|-----------------------------------------|----------------------------|------------------------------|---------------------------------------------|-------------------------------|
|                              | Baseline     | After the first<br>injection |                            | After the second injection<br>on Day 30 |                            |                              |                                             |                               |
|                              |              | 7-day<br>f/u <sup>a</sup>    | 14-day<br>f/u <sup>a</sup> | 30-day<br>f/u <sup>a</sup>              | 90-day<br>f/u <sup>a</sup> | 180-<br>day f/u <sup>a</sup> |                                             |                               |
| <b>N</b>                     | 15           | 15                           | 15                         | 15                                      | 15                         | 15                           |                                             |                               |
| <b>Pain</b>                  | 7 (7,9)      | 5 (4, 7)                     | 4 (3, 6)                   | 5 (4, 7)                                | 5 (2, 6)                   | 4 (2, 6)                     | 3                                           | <b>&lt;0.0002<sup>b</sup></b> |
| <b>Stiffness</b>             | 4 (2, 5)     | 2 (1, 3)                     | 3 (0, 3)                   | 3 (1, 4)                                | 2 (0, 3)                   | 2 (1, 4)                     | 2                                           | 0.0694                        |
| <b>Physical<br/>function</b> | 26 (19, 35)  | 17 (11,<br>25)               | 14 (11,<br>23)             | 22 (13,<br>29)                          | 22 (10,<br>23)             | 16 (8,<br>22)                | 10                                          | <b>0.0005<sup>b</sup></b>     |
| <b>Total<br/>score</b>       | 40 (29, 58)  | 26 (17,<br>32)               | 21 (18,<br>29)             | 26 (21,<br>37)                          | 25 (14,<br>33)             | 20 (15,<br>35)               | 20                                          | <b>0.0002<sup>b</sup></b>     |

A lower WOMAC score indicates lower symptom intensity. Descriptive statistics were used to establish median (IQR) values for patients who had the second injection at the 30-day follow-up visit (N=15). <sup>a</sup>Follow-up period since first injection <sup>b</sup>Statistically significant p-values (<0.05). F/u, follow-up; IQR, interquartile range; WOMAC, Western Ontario and McMaster Universities Osteoarthritis Index.

**Table S2. Patient reported outcomes (median [IQR] VAS and PtGA scores) for patients who needed two injections at the 30-day follow-up visit**

|                                    | Median (IQR)   |                              |                            |                                         |                            |                                 |     | Change<br>from<br>baseline<br>to Day<br>180 | Friedm<br>an test<br>p-value |
|------------------------------------|----------------|------------------------------|----------------------------|-----------------------------------------|----------------------------|---------------------------------|-----|---------------------------------------------|------------------------------|
|                                    | Baseline       | After the first<br>injection |                            | After the second injection<br>on Day 30 |                            |                                 |     |                                             |                              |
|                                    |                | 7-day<br>f/u <sup>†</sup>    | 14-day<br>f/u <sup>†</sup> | 30-day<br>f/u <sup>a</sup>              | 90-day<br>f/u <sup>a</sup> | 180-<br>day<br>f/u <sup>a</sup> |     |                                             |                              |
|                                    |                | N                            |                            |                                         |                            |                                 |     |                                             |                              |
| <b>VAS</b>                         |                |                              |                            |                                         |                            |                                 |     |                                             |                              |
| <b>pain<br/>score</b>              | 15<br>6 (5, 7) | 15<br>6 (4, 6)               | 15<br>5 (3, 6)             | 15<br>6 (4, 7)                          | 15<br>5 (4, 7)             | 15<br>5 (3, 7)                  | 1   | 0.2799                                      |                              |
| <b>PtGA<br/>score,<sup>b</sup></b> | N/A            | 3 (2, 3)                     | 3 (2, 3)                   | 2 (2, 3)                                | 2 (2, 4)                   | 2 (2, 3)                        | N/A | 0.3480                                      |                              |

Descriptive statistics were used to establish median (IQR) values for patients who had the second injection at the 30-day follow-up visit (N=15). One patient with missing VAS and PtGA scores for the 180-day f/u visit (due to dropping out of the study) was excluded from the Friedman's test as this statistical test cannot compute missing values. <sup>a</sup>Follow-up period since first injection. <sup>b</sup>PtGA scores: 4 = much improved, 3 = slightly improved, 2 = no change, 1 = slightly worsened, 0 = much worse. F/u, follow-up; IQR, interquartile range; N/A, not applicable; PtGA, patient global assessment of disease activity; VAS, visual analogue scale.

**Table S3. Safety findings and number of patients who needed rescue medication for patients who needed two injections at the 30-day follow-up visit**

|                                                        | After the first injection |                         | After the second injection on Day 30 |                         |                          |
|--------------------------------------------------------|---------------------------|-------------------------|--------------------------------------|-------------------------|--------------------------|
|                                                        | 7-day f/u <sup>a</sup>    | 14-day f/u <sup>a</sup> | 30-day f/u <sup>a</sup>              | 90-day f/u <sup>a</sup> | 180-day f/u <sup>a</sup> |
| <b>N</b>                                               | 15                        | 15                      | 15                                   | 15                      | 15                       |
| <b>DR-AEs,<sup>b</sup> n (%)</b>                       | 7 (46.7) <sup>c</sup>     | 0                       | 0                                    | 0                       | 0                        |
| <b>Other AEs unrelated to use of the device, n (%)</b> | 0                         | 0                       | 0                                    | 0                       | 0                        |
| <b>DR-AE duration from the day of injection, days</b>  |                           |                         |                                      |                         |                          |
| Mean (SD)                                              | 1.0 (1.4)                 | N/A                     | N/A                                  | N/A                     | N/A                      |
| Median (range)                                         | 0 (0, 4)                  | N/A                     | N/A                                  | N/A                     | N/A                      |
| <b>Patients who required rescue therapy, n (%)</b>     | 7 (46.7)                  | 1 (6.7)                 | 9 (60.0)                             | 5 (33.3)                | 6 (40.0)                 |

<sup>a</sup>Follow-up period since first injection. <sup>b</sup>DR-AE related to the use of an investigational medical device. <sup>c</sup>Five patients had swelling, three patients had rigidity, one patient had a burning sensation, and one patient had pain; median duration of adverse device event symptoms was 0 (IQR, 0, 2) days. Individual patients could have more than one adverse device event. AE, adverse event; DR-AE, device-related adverse events; F/u, follow-up; IQR, interquartile range; n, number of patients; N/A, not applicable; SD standard deviation.
